# Supplementary material
Source: MDPI journal article supplement (https://www.mdpi.com/2073-4344/7/8/229)
Supplement: s1 [file s1]

# Supplementary Materials: Fast and Large-Scale Anodizing Synthesis of Pine-Cone TiO<sub>2</sub> for Solar-Driven Photocatalysis

Yan Liu, Yanzong Zhang, Lilin Wang, Gang Yang, Fei Shen, Shihuai Deng, Xiaohong Zhang, Yan He, Yaodong Hu, and Xiaobo Chen

**This PDF file includes:**

Methods

Figures S1–S20

Tables S1 – S2

## Methods

### *Synthesis of graphene*

Graphene was synthesized by an electrochemical exfoliation method. Two graphite rods (99.99%, Shanghai Zichen Co., China) were inserted into an electrolyte (0.5g NaCl and 20 mL isopropanol) serving as anode and cathode, and a bias of 15 V was applied between the two electrodes using a direct current power supply. After a continuous reaction for 10 h, a dark solution was formed in the reaction beaker. The dark solution was then centrifuged at 956 ×g (E-5480R, Germany) to remove the large agglomerates. The graphene powder was collected by centrifuging at 27,530 ×g (Allegra 64R Centrifuge, Beckman Coulter), and washed several times with absolute ethanol and deionized water until no Cl<sup>−</sup> was detectable. The obtained graphene was then dried at 333 K.

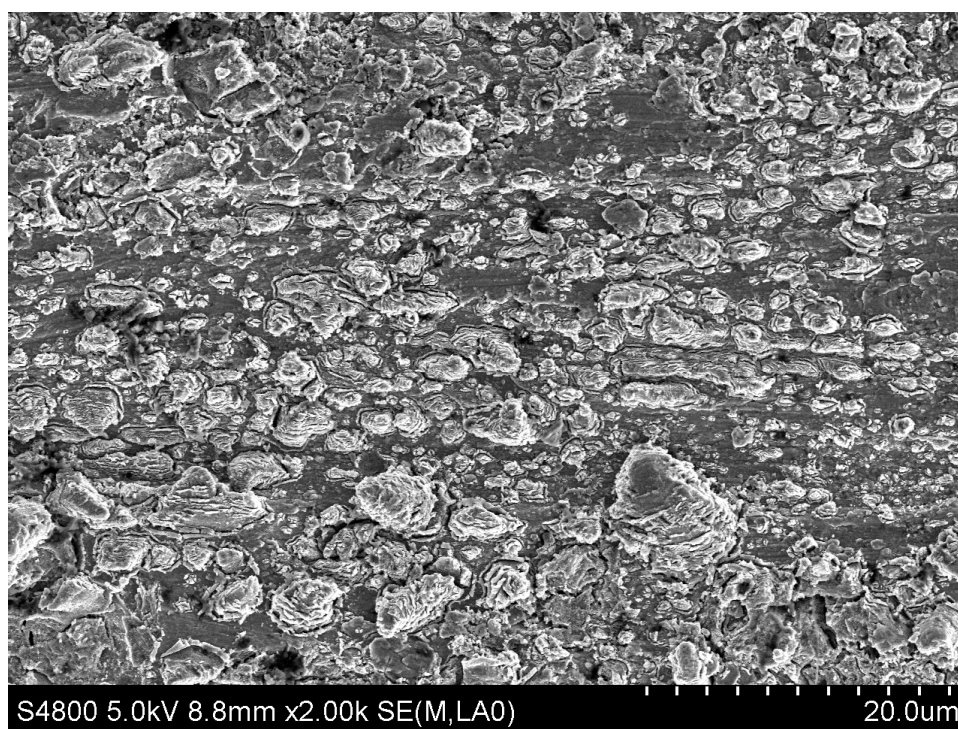

**Figure S1.** FE-SEM image of overall PCT film.

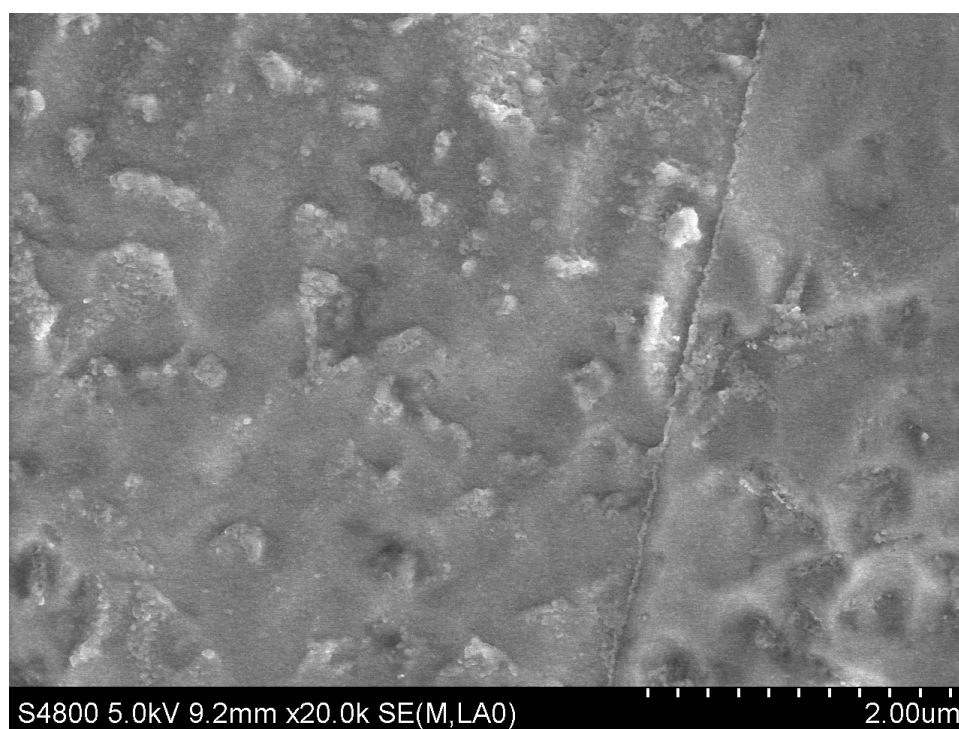

**Figure S2.** FE-SEM images of the TiO<sub>2</sub> film anodized in the electrolyte of magnesium nitrate solution (100 mg L<sup>-1</sup>, 50 mL) at 60 V for 2 min.

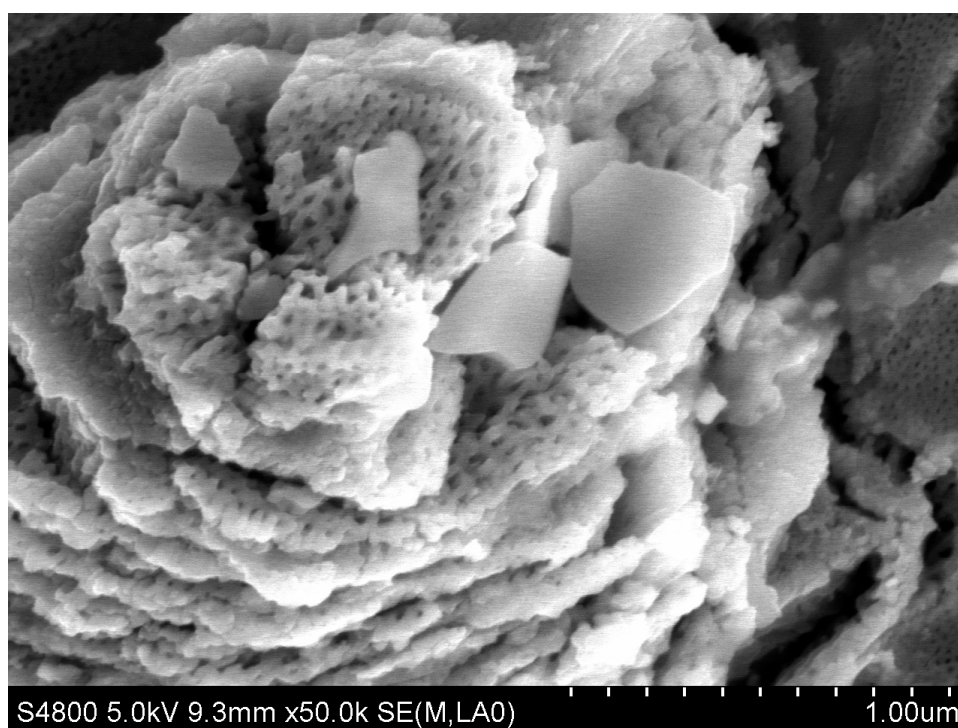

**Figure S3.** FE-SEM image of top view of the PCT film.

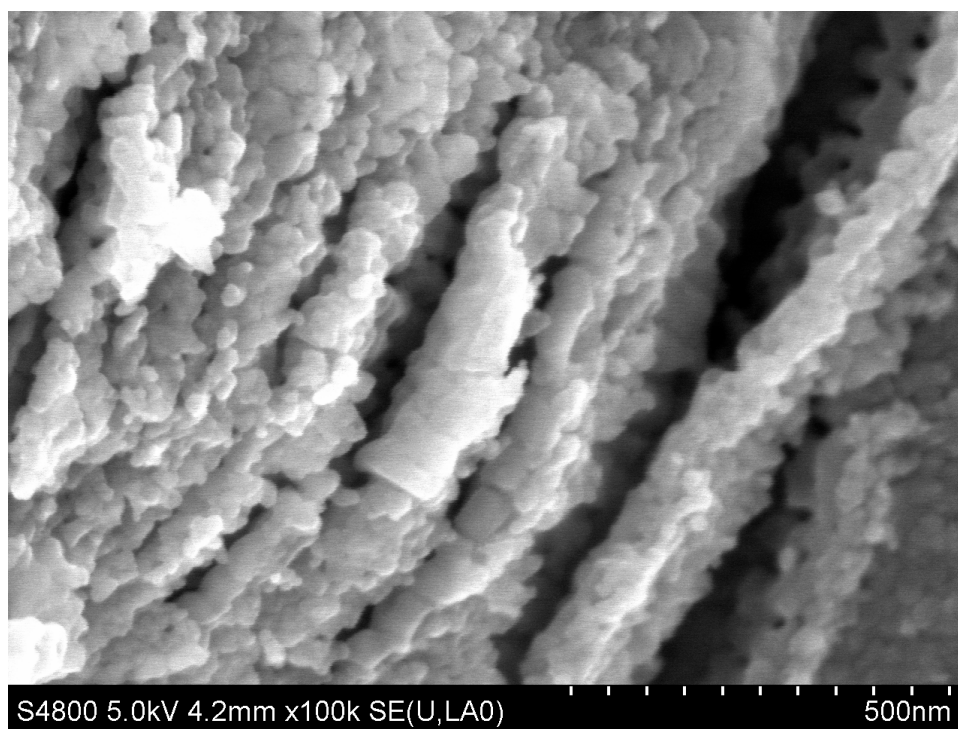

**Figure S4.** FE-SEM image of layer structure of the PCT film.

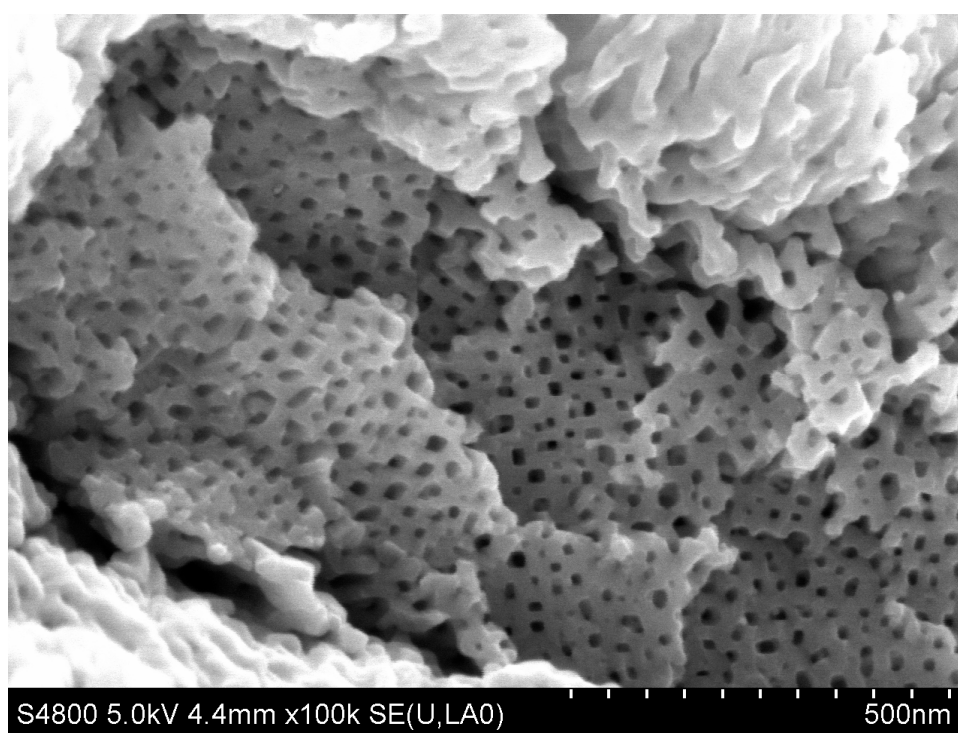

**Figure S5.** FE-SEM image of cracks on the oxide layer.

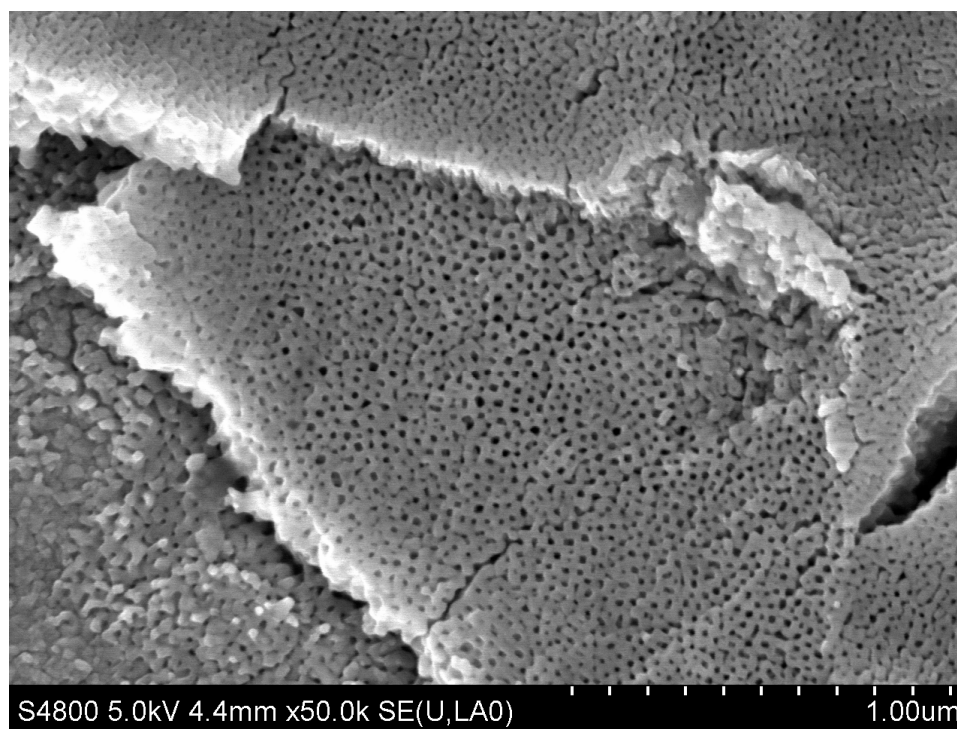

**Figure S6.** FE-SEM image of the nanoporous oxide layer.

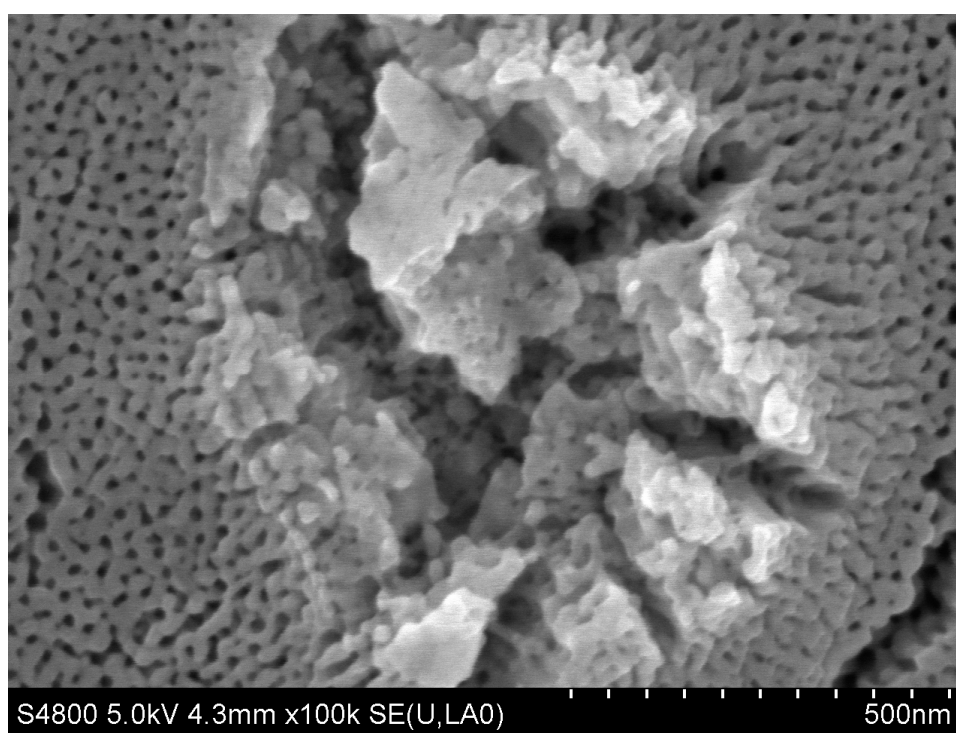

**Figure S7.** FE-SEM image of small cracks in the Figure 1A.

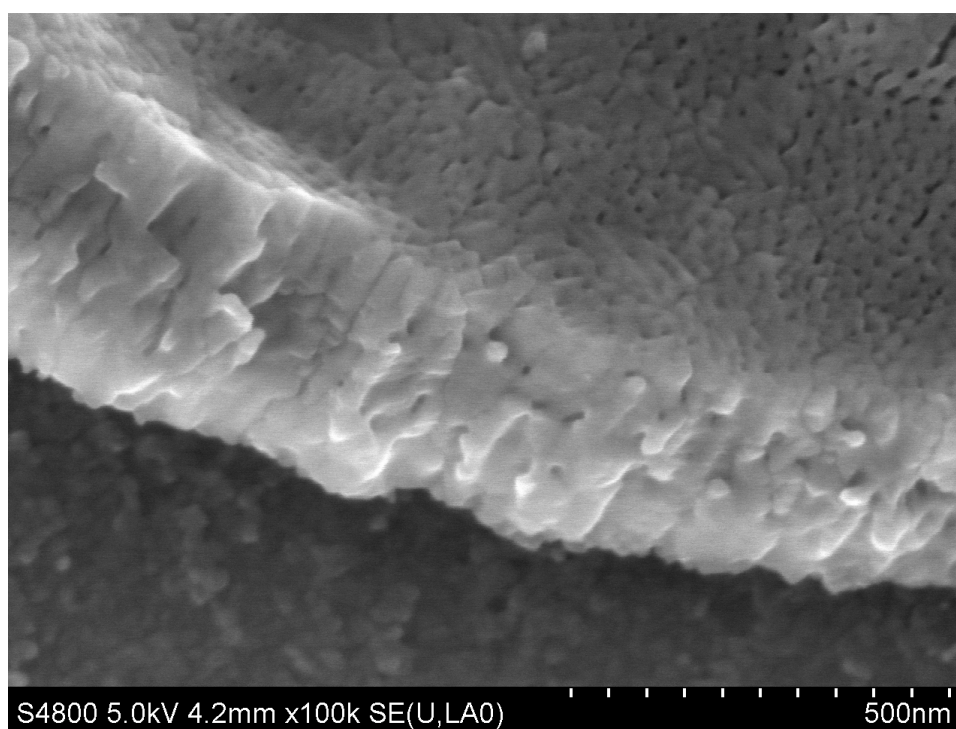

Figure S8. FE-SEM image of TiO<sub>2</sub> fragment washed up by O<sub>2</sub> gas.

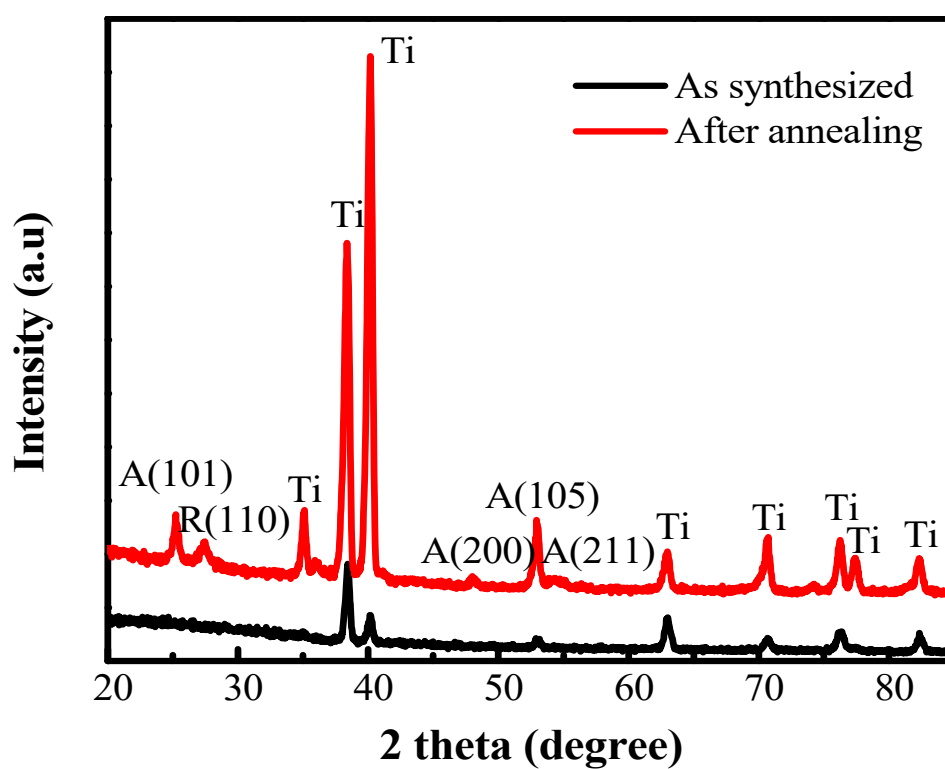

Figure S9. XRD patterns of the PCT films. Specific diffraction peaks for anatase (JCPDS#21-1272) and rutile (JCPDS#21-1276) are labeled according to A(hkl) and R(hkl), respectively.

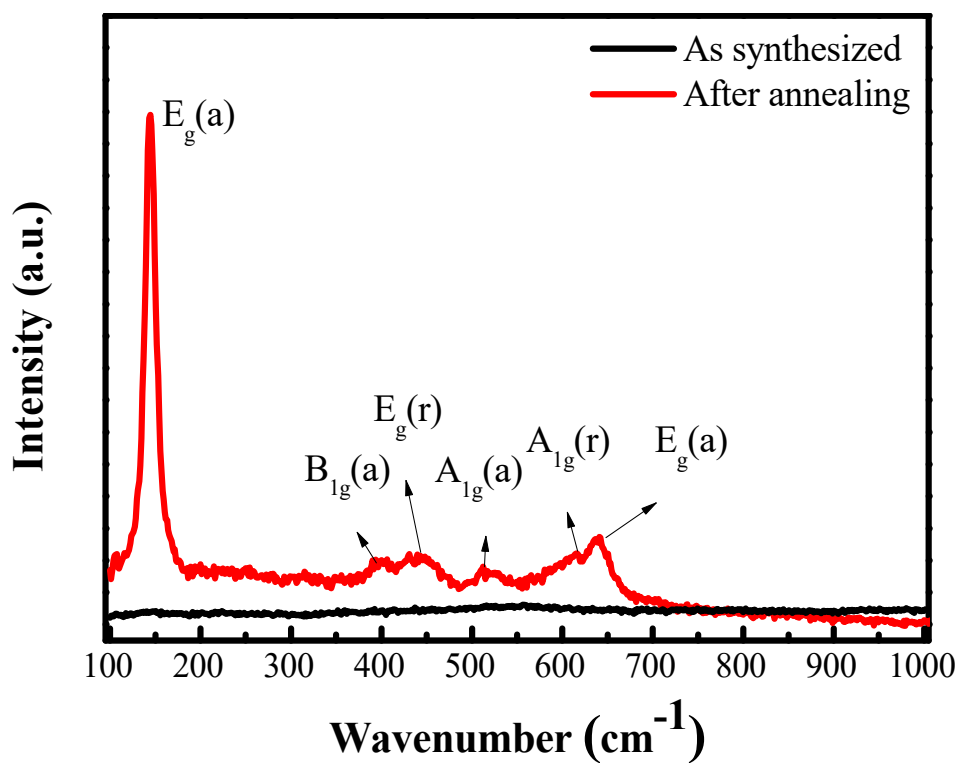

**Figure S10.** Raman scattering patterns of the PCT films, where the anatase and rutile vibration modes are labeled according to mode (a) and mode (r), respectively.

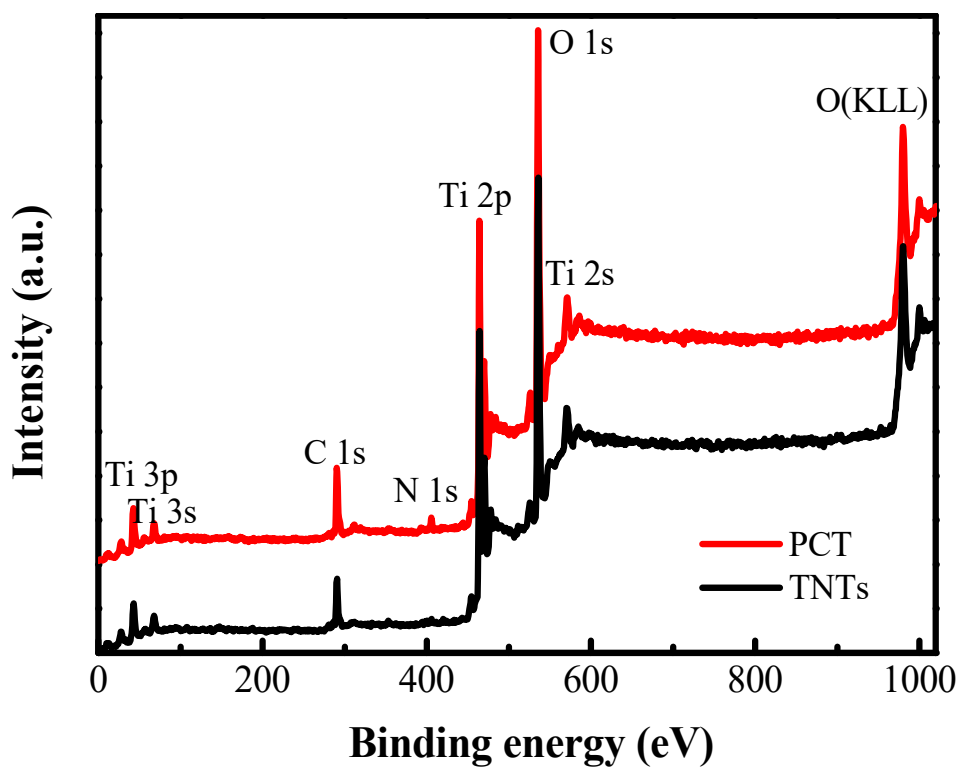

**Figure S11.** Full XPS spectra of PCT film and TNTs.

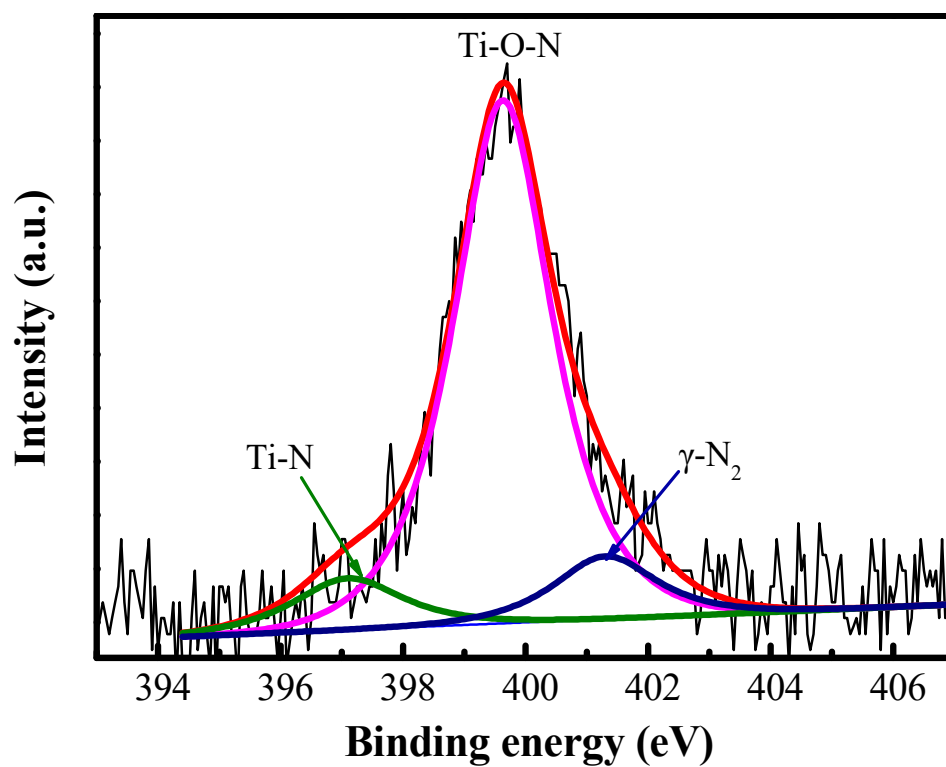

Figure S12. N 1s XPS spectrum of the PCT film.

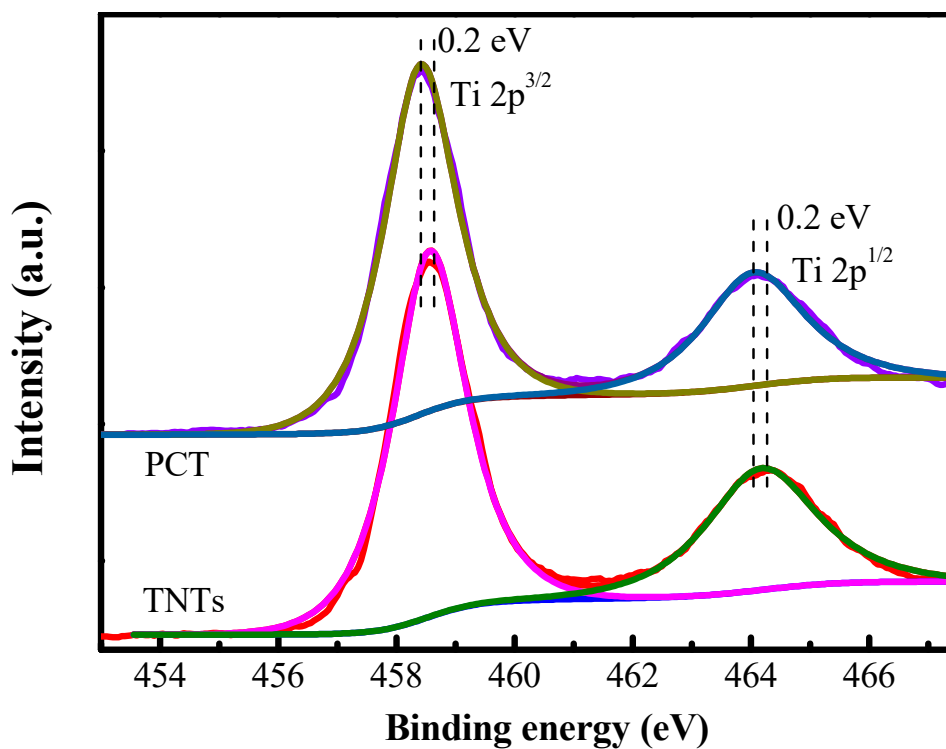

Figure S13. Ti 2p XPS spectra of the PCT film and TNTs.

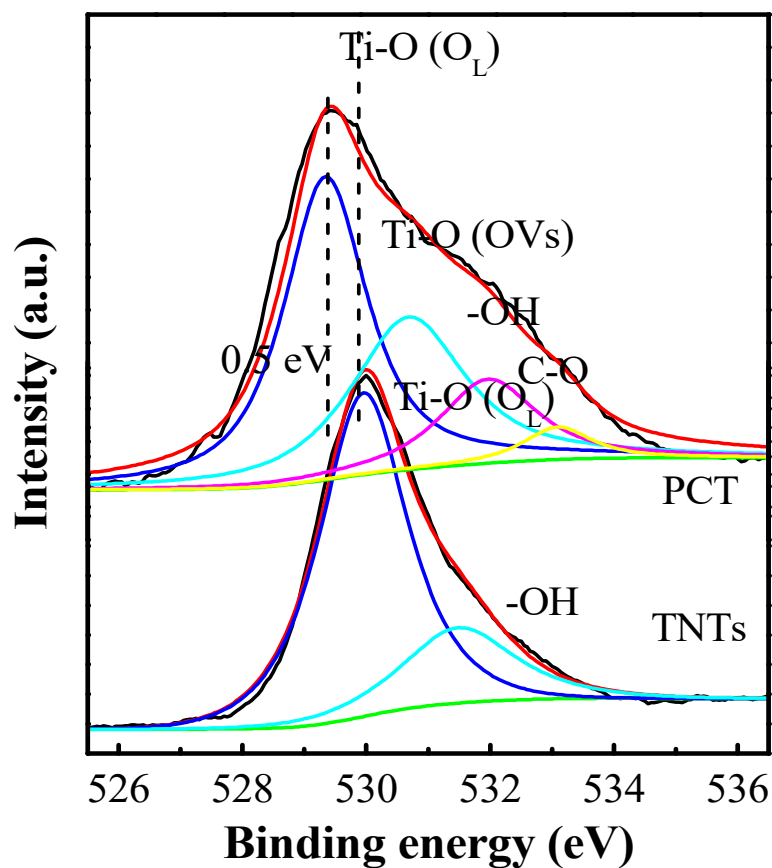

Figure S14. O 1s XPS spectra of the PCT film and TNTs.

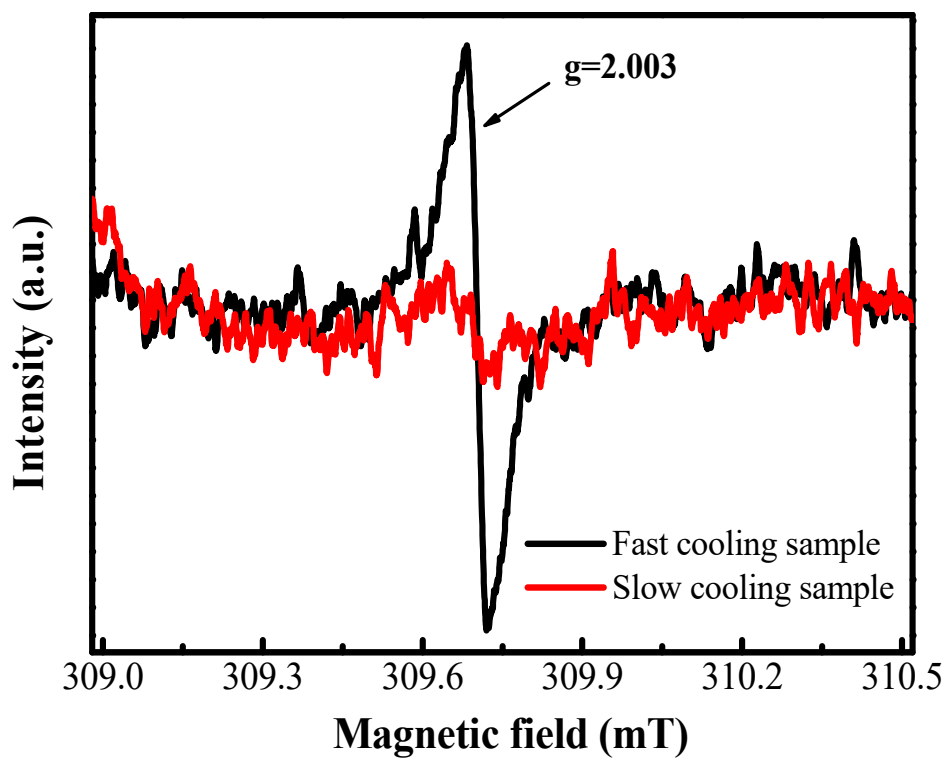

Figure S15. ESR spectra of PCT film with different cooling styles after calcination at 723 K for 2 h.

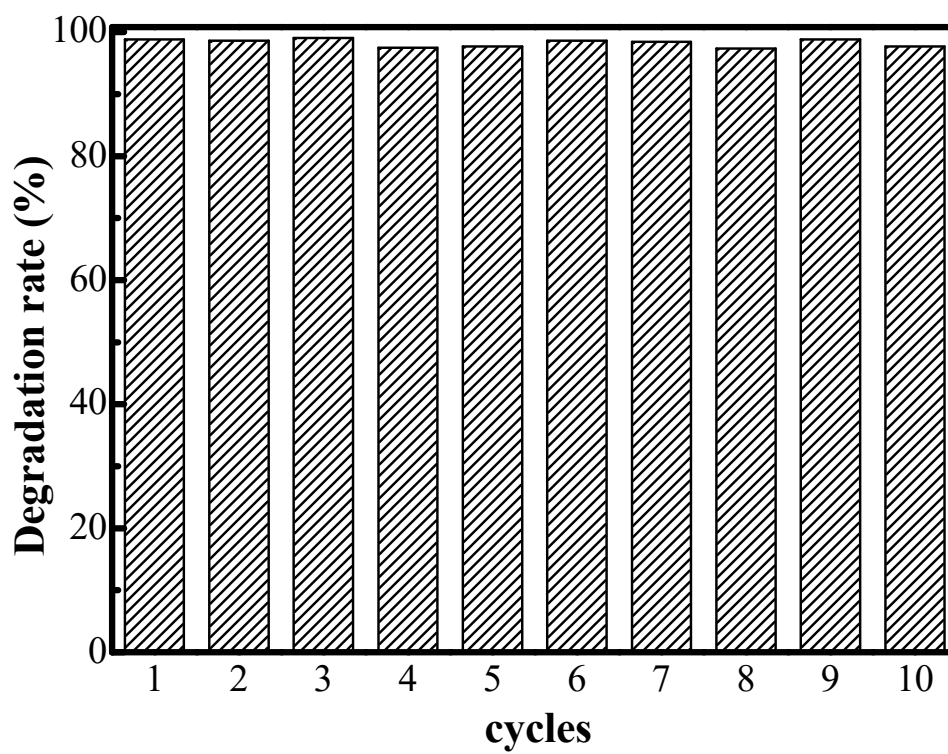

**Figure S16.** Stability test of methyl orange degradation for ten cycles under natural sunlight ( $C_{MO} = 20 \text{ mg L}^{-1}$ ,  $V_{MO} = 40 \text{ mL}$ ).

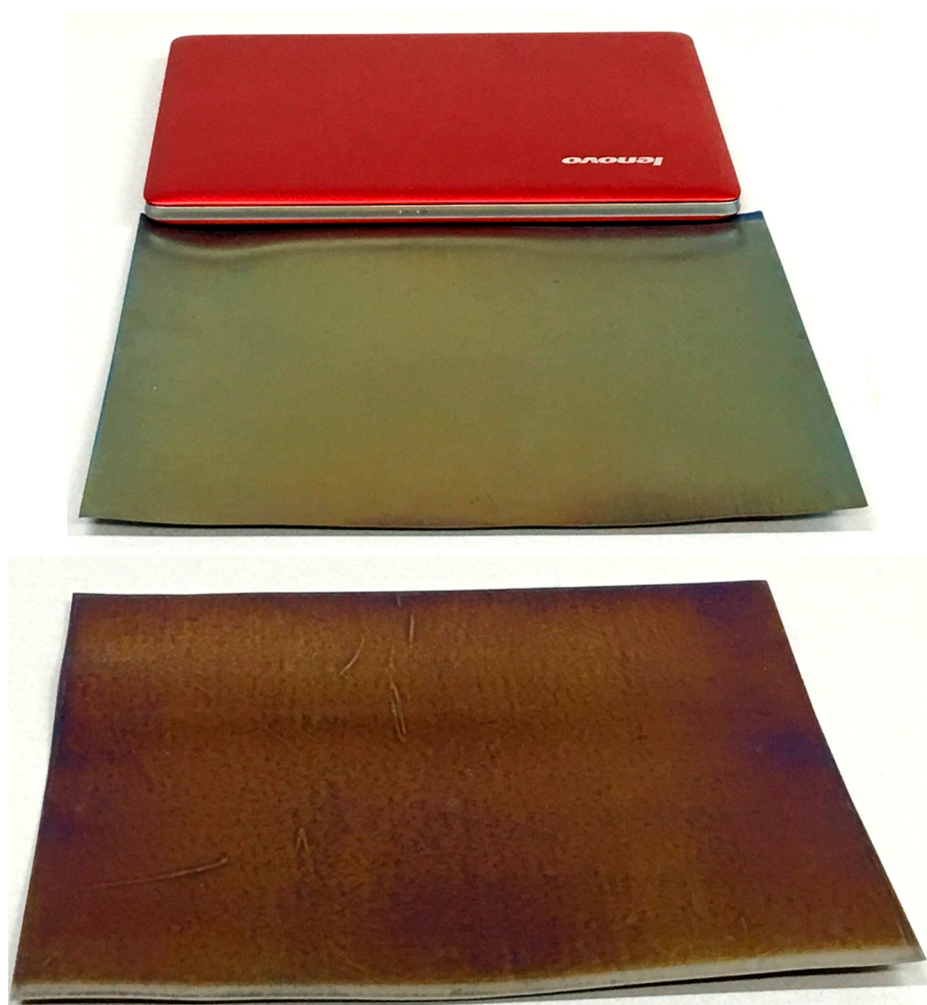

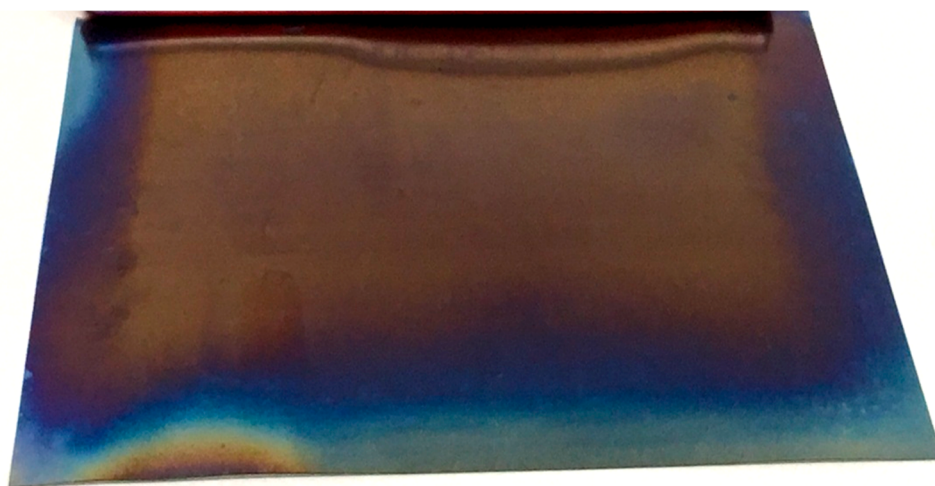

**Figure S17.** Pictures for the large-scale PCT films prepared by different anodization conditions. A laptop was used as a reference.

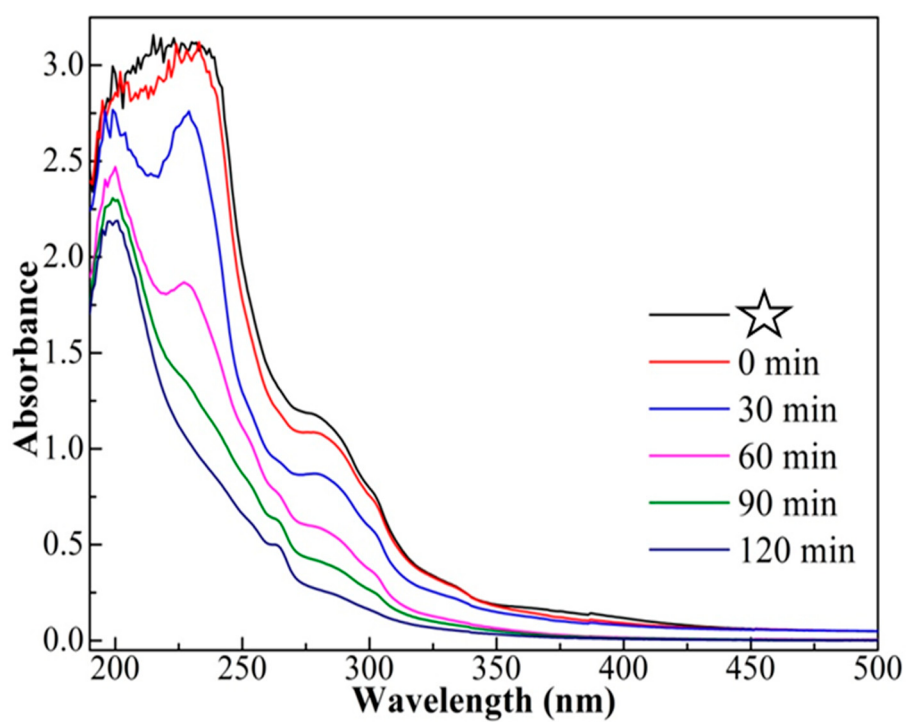

**Figure S18.** UV-Vis absorbance of the printing and dyeing wastewater during the photoelectrochemical degradation process. ☆ represents the absorbance of the waste water after flocculation and precipitation.

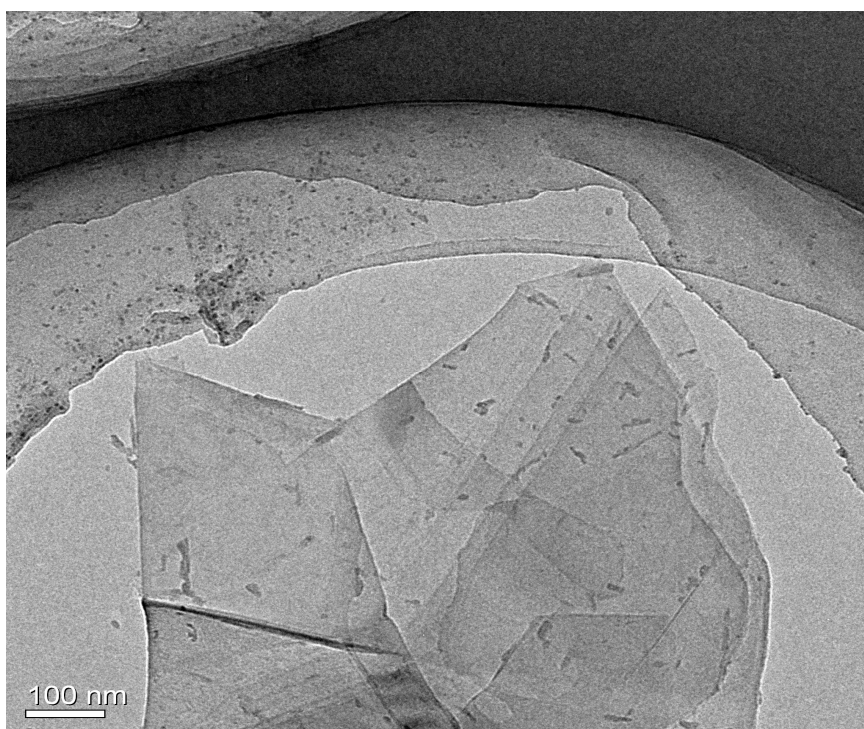

**Figure S19. TEM images of prepared graphene.** The as-prepared graphene was almost completely transparent and had an average length and width of about 500 and 300 nm.

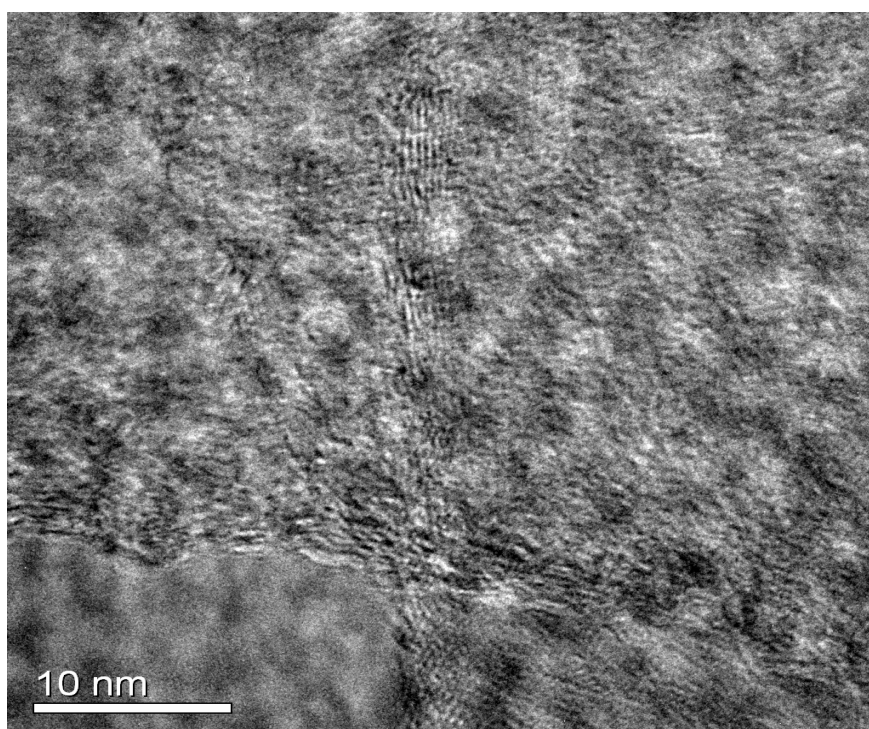

**Figure S20. HRTEM images of prepared graphene.** The graphene was no more than 7 layers thick.

## Tables S1-S2

**Table S1.** Lattice parameters and particle sizes of the PCT film

| Crystal phase | <i>d</i> -spacing (Å) |              | FWHM (Å) | Crystallite size (nm) | Phase ratio |
|---------------|-----------------------|--------------|----------|-----------------------|-------------|
|               | theoretical           | experimental |          |                       |             |
| Anatase       | 3.5200                | 3.5270       | 0.410    | 19.6                  | 0.78        |
| Rutile        | 3.2470                | 3.2425       | 0.445    | 18.1                  | 0.22        |

**Table S2.** Average illumination intensity of sunlight and outside temperature during the MO photodegradation.

| Weather    | Photodegradation time (min) | 30     | 60     | 90     | 120    |
|------------|-----------------------------|--------|--------|--------|--------|
| Sunny Day  | Illumination intensity (lx) | 87,020 | 88,220 | 89,800 | 90,080 |
|            | Temperature (K)             | 306    | 306    | 307    | 307    |
| Cloudy day | Illumination intensity (lx) | 51,030 | 50,850 | 36,220 | 41,890 |
|            | Temperature (K)             | 301    | 301    | 301    | 302    |
